# Supplementary material for: Hierarchical hollow porous structures of nickel-doped λ-MnO2 anodes for Li-ion energy storage systems
Source: Royal Society of Chemistry journal article supplement (doi:10.1039/d4na00023d), 2024-01-01
Supplement: d4na00023d1.pdf [file d4na00023d1.pdf]

## Hierarchical Hollow Porous Structures of Nickel Doped $\lambda$ - $\text{MnO}_2$ Anode for Li-ion Energy Storage Systems

Venugopal Nulu, Arunakumari Nulu, Keun Yong Sohn\*

Department of Nanoscience and Engineering, Center for Nano Manufacturing, Inje University,  
197 Inje-ro, Gimhae, Gyeongnam-do 50834, Republic of Korea

\* Correspondence to: K. Y. Sohn, Department of Nanoscience and Engineering, Center for Nano Manufacturing, Inje University, 197 Inje-ro, Gimhae, Gyeongnam-do 50834, Republic of Korea

*E-mail addresses:* [ksohn@inje.ac.kr](mailto:ksohn@inje.ac.kr)

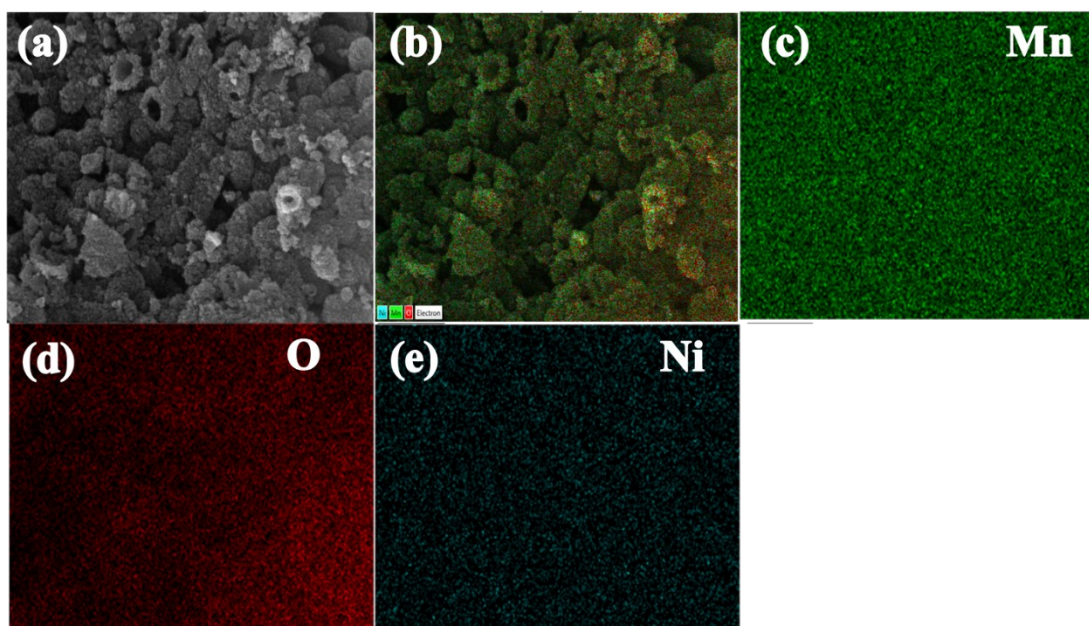

Figure S1. a) SEM image, b) SEM image comprised of layered elemental mappings containing Mn (image c), O (image d), and Ni (image e) of 20Ni-hMO.

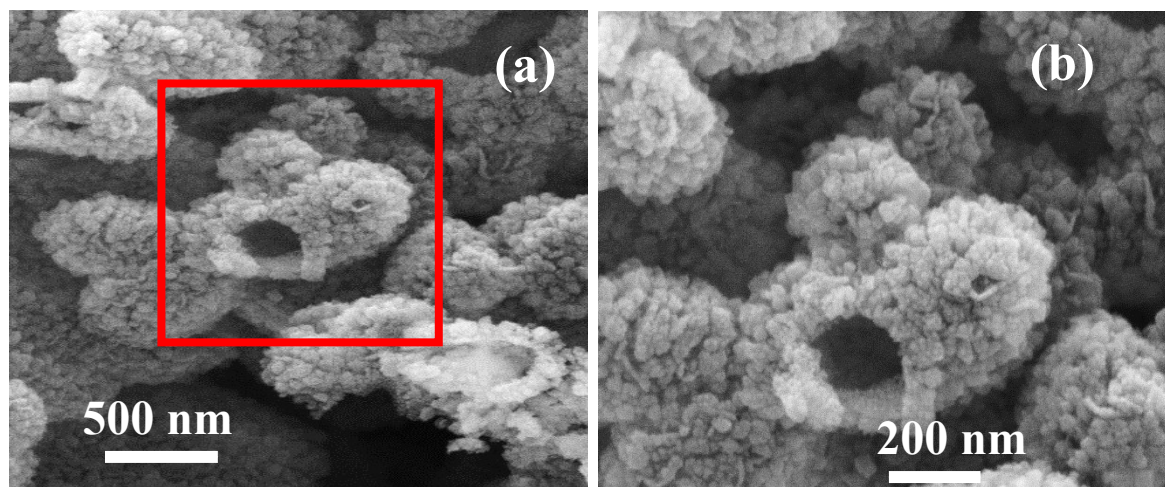

Figure S2. a) FE-SEM image of an aggregated group of h-MO three-dimensional hollow particles and b) is the close view of the selected hollow particle shown in the image (a).

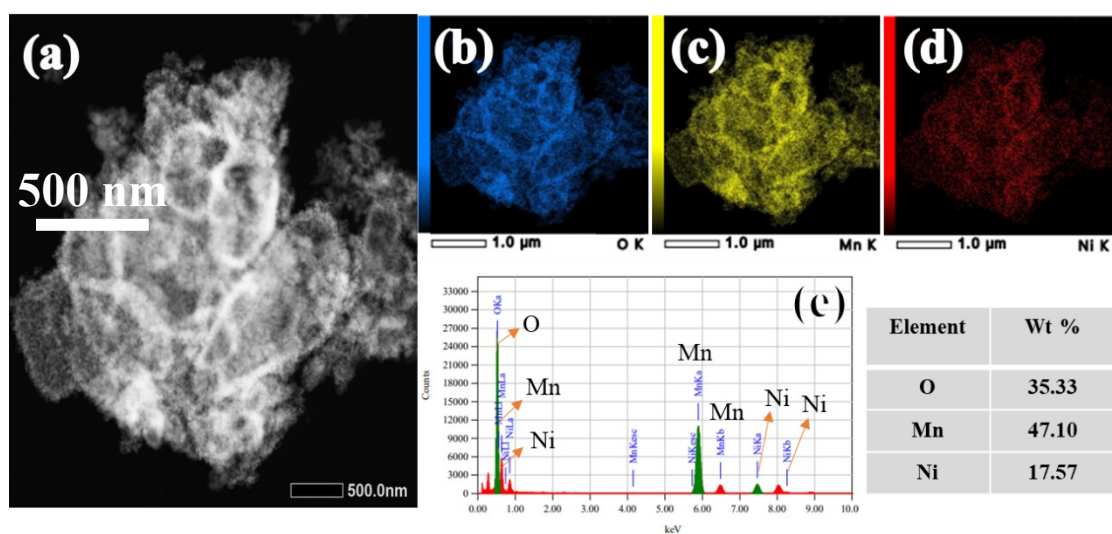

Figure S3. a) STEM image of 20Ni-hMO and the respective elemental mappings of (b) Mn (c) O (d) Ni, respectively. (e) TEM-EDX spectra with elemental composition table.

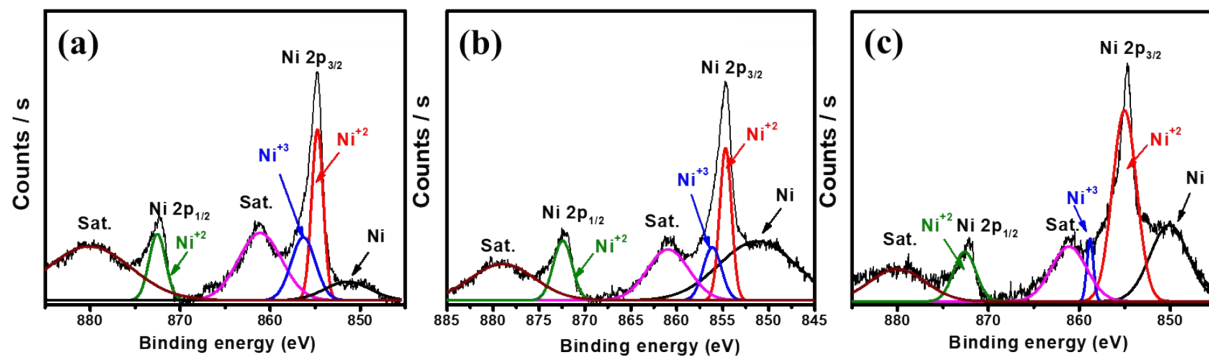

Figure S4. XPS spectra of Ni<sup>2p</sup> and Ni<sup>0</sup> for the three Ni doped samples. (a) 10Ni-hMO (b) 20Ni-hMO and (c) 30Ni-hMO.

| Name               | Peak BE | Atomic % | Mass % |
|--------------------|---------|----------|--------|
| Ni 2p <sup>3</sup> | 852.37  | 7.30     | 15.9   |
| Mn 2p <sup>3</sup> | 640.12  | 29.58    | 51.4   |
| O 1s               | 527.27  | 63.12    | 32.7   |

Table S1. Elemental surface atomic percentages of 20Ni-hMO sample obtained by XPS.

| Sample                                              | Concentration (%) |      |       |
|-----------------------------------------------------|-------------------|------|-------|
|                                                     | Ni                | Li   | Mn    |
| $\lambda$ -MnO <sub>2</sub> (h-MO)                  | -                 | 2.10 | 76.30 |
| 20% Ni doped $\lambda$ -MnO <sub>2</sub> (20Ni-hMO) | 16.54             | 2.27 | 71.42 |

Table S2: The actual elemental compositions of h-MO and 20Ni-hMO samples from ICP-OES.

| Name     | Area under the curve(%) |                  |                 |
|----------|-------------------------|------------------|-----------------|
|          | Ni <sup>+2</sup>        | Ni <sup>+3</sup> | Ni <sup>0</sup> |
| 10Ni-hMO | 16.4                    | 12.4             | 6.1             |
| 20Ni-hMO | 14.4                    | 7.8              | 33.8            |
| 30Ni-hMO | 36.2                    | 3.2              | 18.2            |

Table S3: Comparison of the percentages of Ni oxidation states in the three Ni-doped samples obtained by XPS.

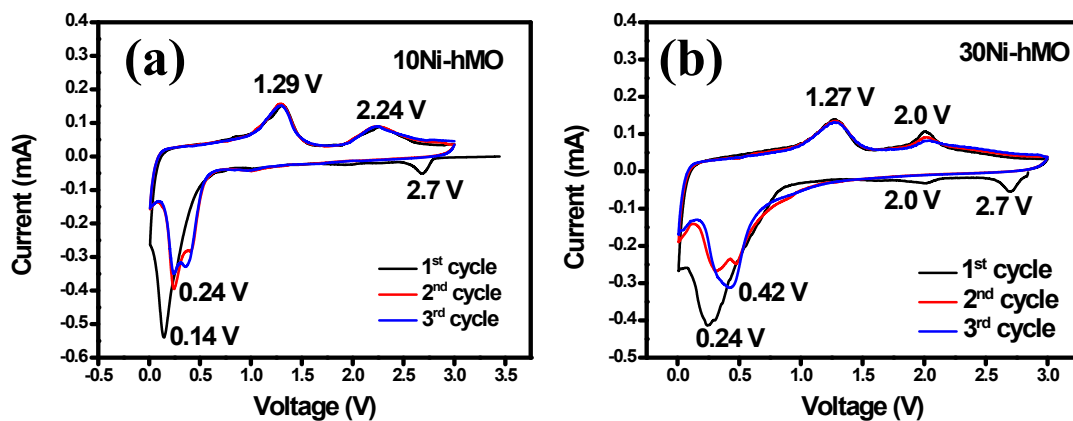

Figure S5. Cyclic voltammograms for the first three cycles of (a) 10Ni-hMO (b) 30Ni-hMO at a scan rate of 0.1 mV s<sup>-1</sup>

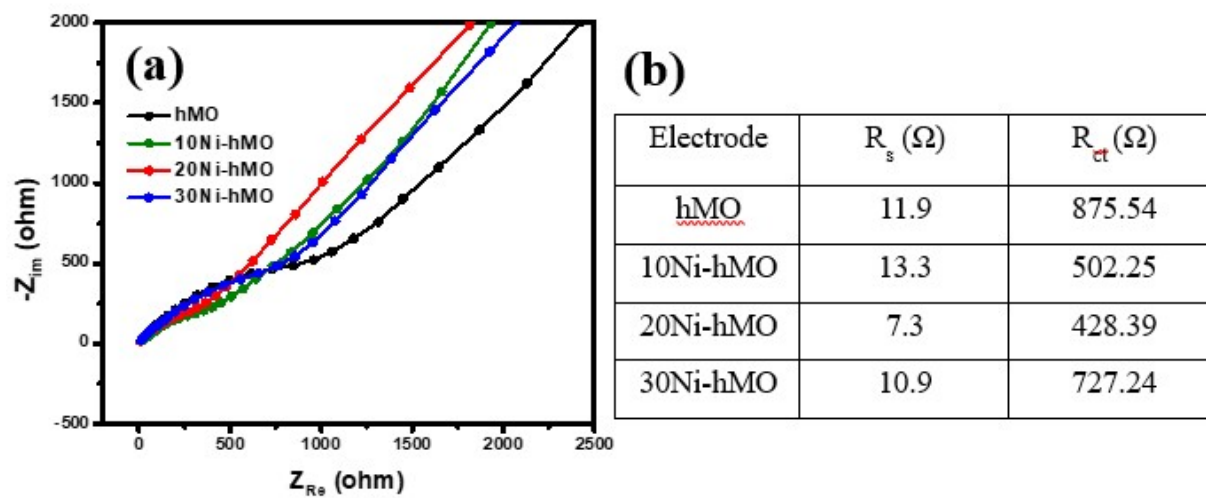

Figure S6. Nyquist plots of the fresh h-MO, 10Ni-hMO, 20Ni-hMO, and 30Ni-hMO electrodes.  
 (b) Tabulated parameter values for the electrodes.

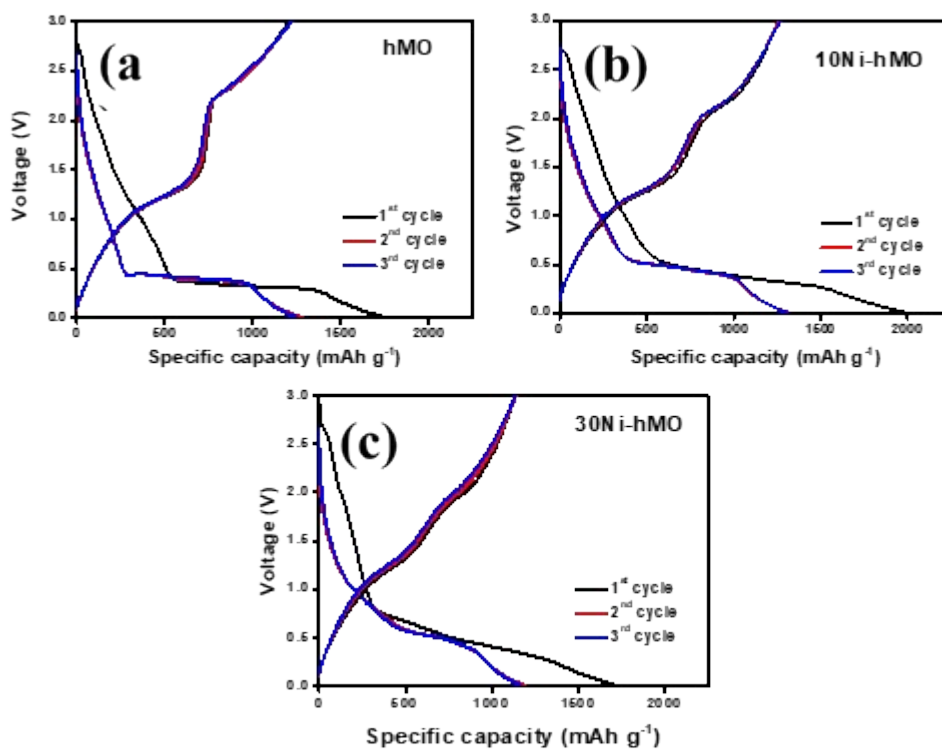

Figure S7. The respective charge–discharge profiles for the 1<sup>st</sup>, 2<sup>nd</sup>, and 3<sup>rd</sup> cycles of the h-MO and Ni-doped MnO<sub>2</sub> electrodes cycled at 200 mAh g<sup>-1</sup> (see Fig. 8a in the main data) are shown in (a, b, c).

| Electrode | $R_s$ ( $\Omega$ ) | $R_{SEI}$ ( $\Omega$ ) | $R_{ct}$ ( $\Omega$ ) | $D$ ( $\text{cm}^2 \text{s}^{-1}$ ) |
|-----------|--------------------|------------------------|-----------------------|-------------------------------------|
| hMO       | 11.0               | 16.2                   | 30.4                  | $6.91 \times 10^{-13}$              |
| 10Ni-hMO  | 5.4                | 18.2                   | 32.1                  | $7.23 \times 10^{-13}$              |
| 20Ni-hMO  | 5.2                | 12.4                   | 20.8                  | $2.24 \times 10^{-12}$              |
| 30Ni-hMO  | 7.5                | 19.3                   | 36.3                  | $1.08 \times 10^{-12}$              |

Table. S4. Summarized circuit (shown in Fig. 9) parameters values.



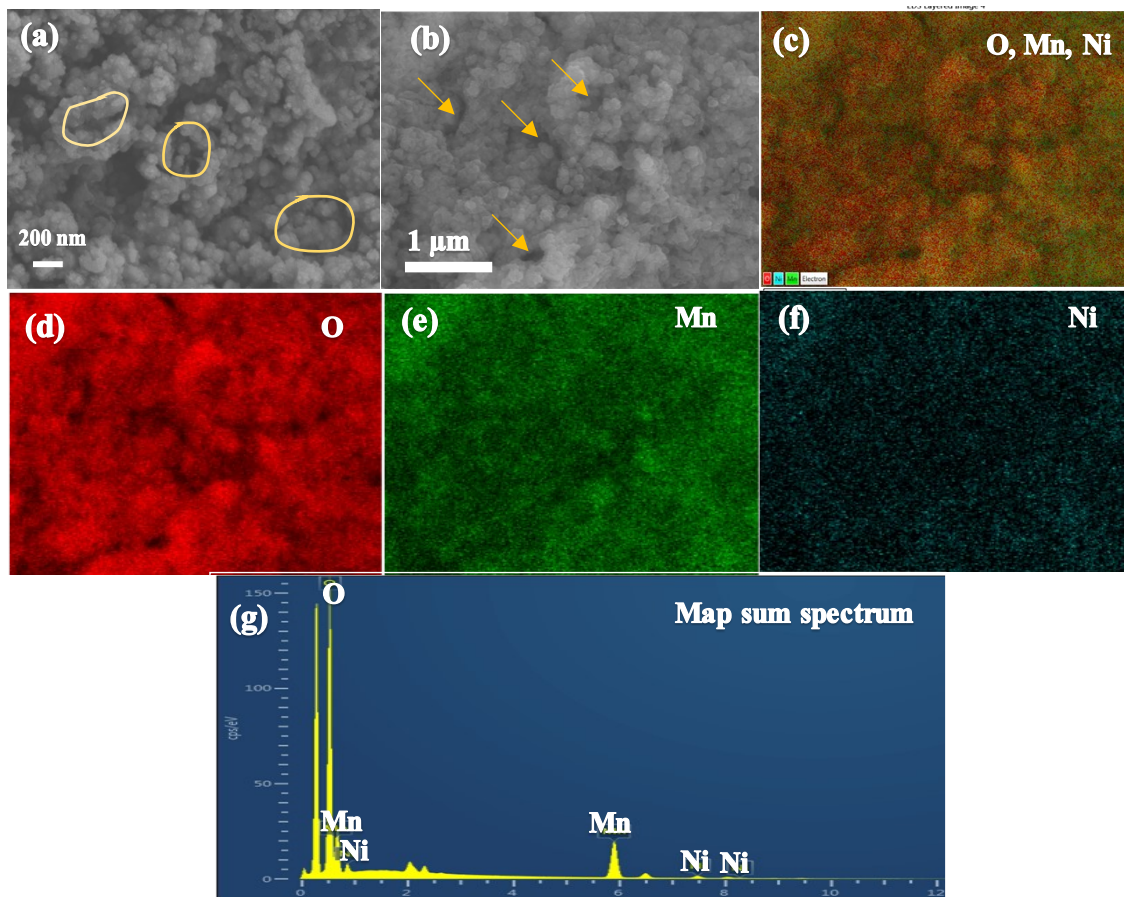

Figure S8. (a, b) SEM images of the anode 20Ni-hMO after cycling. (c) Layered mapping of the elements, elemental mapping of (d) O (e) Mn (f) Ni and (g) SEM-EDAX spectra of image (b).



| <b>Material</b>                         | <b>Applied current</b> | <b>Initial coulombic efficiency(ICE)</b> | <b>Discharge capacity 2<sup>nd</sup> cycle</b> | <b>Discharge capacity (after cycling)</b> | <b>Ref.</b> |
|-----------------------------------------|------------------------|------------------------------------------|------------------------------------------------|-------------------------------------------|-------------|
| Nanotube                                | 80 mA g <sup>-1</sup>  | 25.1 %                                   | ~300 mAh g <sup>-1</sup>                       | ~110 mAh g <sup>-1</sup> (40th cycle)     | 1           |
| Microsphere                             | 500 mA g <sup>-1</sup> | 61.3 %                                   | ~1000 mAh g <sup>-1</sup>                      | ~220 mAh g <sup>-1</sup> (100th cycle)    | 2           |
| Nanoparticle                            | 100 mA g <sup>-1</sup> | 51.7 %                                   | ~630 mAh g <sup>-1</sup>                       | ~450 mAh g <sup>-1</sup> (10th cycle)     | 3           |
| Nanorod                                 | 100 mA g <sup>-1</sup> | 70.3 %                                   | ~1230 mAh g <sup>-1</sup>                      | ~1075 mAh g <sup>-1</sup> (100th cycle)   | 4           |
| Nanoflake                               | 500 mA g <sup>-1</sup> | 33.8 %                                   | ~700 mAh g <sup>-1</sup> (4th cycle)           | ~560 mAh g <sup>-1</sup> (100th cycle)    | 5           |
| Hollowcube                              | 50 mA g <sup>-1</sup>  | 27.2 %                                   | ~400 mAh g <sup>-1</sup>                       | ~281 mAh g <sup>-1</sup> (500th cycle)    | 6           |
| Nanowire                                | 123 mA g <sup>-1</sup> | 31.7 %                                   | ~500 mAh g <sup>-1</sup>                       | ~250 mAh g <sup>-1</sup> (100th cycle)    | 7           |
| Ni-doped porous hollow MnO <sub>2</sub> | 200 mA g <sup>-1</sup> | 72.7%                                    | 1429 mAh g <sup>-1</sup>                       | 1636 mAh g <sup>-1</sup> (50th cycle)     | This work   |

Table S5: Comparison between our Ni-doped MnO<sub>2</sub> (20Ni-hMO) hollow nanostructured anode material and the recently reported different nanostructures of MnO<sub>2</sub> and their carbon hybrid and Ni doped MnO<sub>2</sub> structures for LIBs.

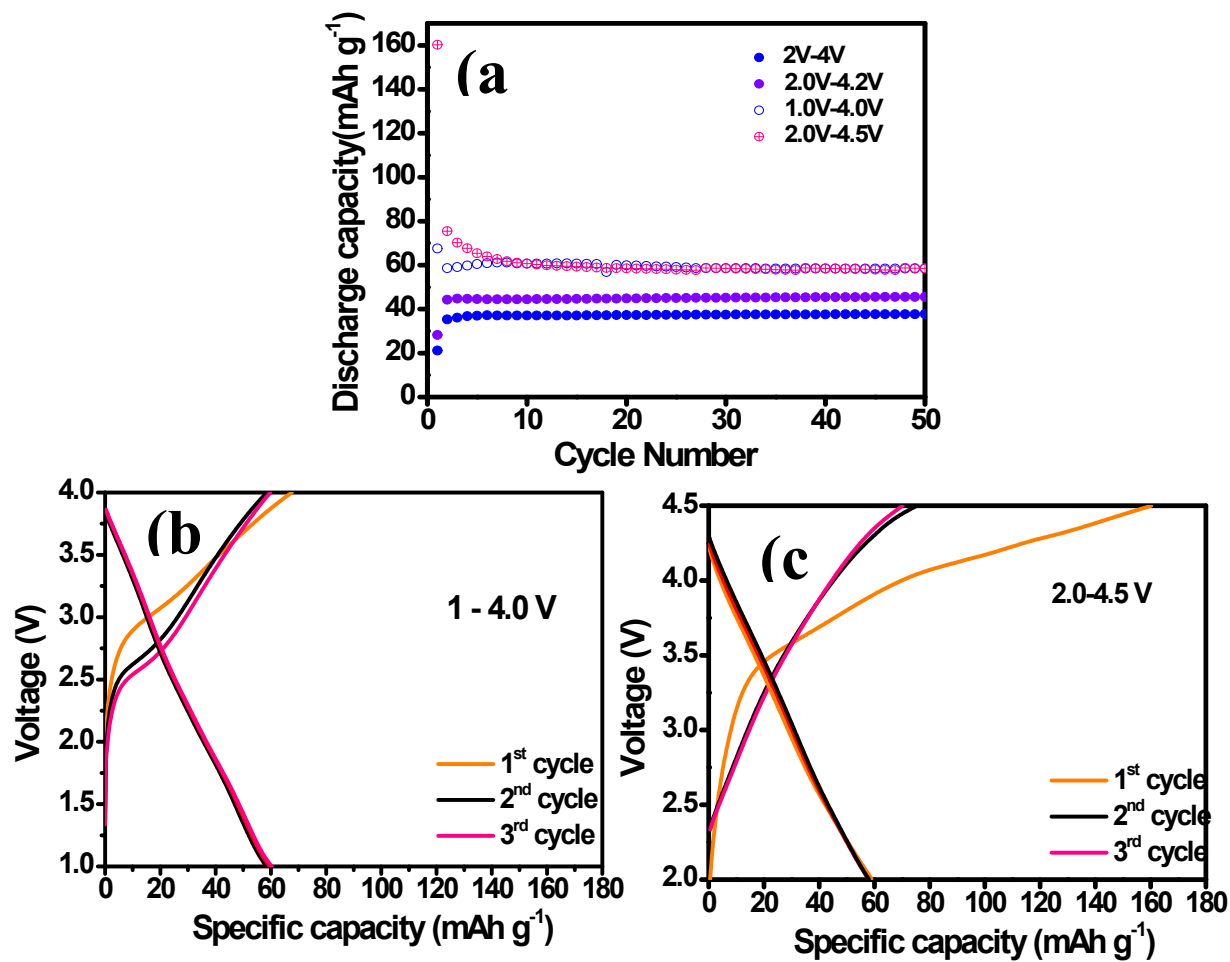

Figure S9. (a) Galvanostatic charge-discharge cycling performance of AC at different voltages at a current density of  $100 \text{ mA g}^{-1}$ . Charge-discharge curves of AC cycled between (b) 2-4.5 V (c) 1-4.0 V.

## References

1. Y. S. Ding, X. F. Shen, S. Sithambaram, S. Gomez, R. Kumar, V. M. B. Crisostomo, S. L. Suib, M. Aindow, *Chem. Mater.* 2005, **17**, 5382.
2. Y. S. Horn, S. A. Hackney, C. S. Johnson, M. M. Thackeray, *J. Electrochem. Soc.* 1998, **145**, 582.
3. M. Toupin, T. Brousse, D. Bélanger, *Chem. Mater.* 2004, **16**, 3184.
4. L. Gao, L. Zhang, S. Jia, X. Liu, Y. Wang, S. Xing, *Electrochim. Acta*, 2016, **203**, 59.
5. H. Chen, B. Zhang, F. Li, M. Kuang, M. Huang, Y. Yang, Y. X. Zhang, *Electrochim. Acta*, 2016, **187**, 488.
6. R. N. Reddy, R. G. Reddy, *J. Power Sources*, 2004, **132**, 315.
7. J. Cao, Q. Mao, L. Shi, Y. Qian, *J. Mater. Chem.* 2011, **21**, 16210.
